# Supplementary material for: Die Operationalisierte Psychodynamische Diagnostik des Kindes- und Jugendalters (OPD-KJ-2) im klinischen Alltag mit dem Plämokasten
Source: Atypon-hosted journal article supplement (doi:10.1024/1422-4917/a000971), 2024-02-07
Supplement: 1422-4917_a000971_esm1.pdf [file 1422-4917_a000971_esm1.pdf]

## Elektronisches Supplement

### eMaterial und Methoden

Über die online verfügbare Software Clustvis (<http://biit.cs.ut.ee/clustvis/>) (Metsalu & Vilo, 2015) wurde eine Hierarchische Cluster-Analyse (HCA) erstellt, um Ähnlichkeiten in der Beurteilung zwischen den Rater\_innen zu entdecken und zu visualisieren (Maurer, 2006). Der Datensatz wurde dafür log<sub>2</sub>-transformiert und zentriert. Fehlende Werte wurden durch Imputation ergänzt, leere Spalten oder Reihen entfernt. Es ergaben sich 84 Reihen, entsprechend 42 Fällen zu je 2 Rater\_innen, und 68 Spalten, entsprechend den Variablen der OPD-KJ2 (eTab. 1). Sowohl Zeilen als auch Reihen wurden der HCA durch Korrelations-Distanzen und Average Linkage unterzogen.

eAbb. 1. Hierarchische Cluster-Analyse (HCA) des Datensatzes zur Inter-Rater\_innen Reliabilität. Auf der X-Achse sind die Variablen der OPD-KJ2 aufgetragen, die nach eTab. 1 verschlüsselt wurden. Auf der Y-Achse sind die Ratings und die Rater\_innen aufgetragen (erste Zahl: Nummer des Ratings, bei 42 Fällen ergaben sich 84 Ratings; zweite Zahl: Code für die jeweilige Rater\_in). Der Pseudo-Farbcode (rot – blau) gibt die log2-transformierten Werte der Ratings wieder. Deutlich zu erkennen sind mindestens 4 Cluster (Ziffern ❶-❹). In Cluster ❹ finden sich die Variablen der Strukturachse (Ziffern 3xx), in Cluster ❸ die aus der Beziehungsachse (Ziffern 1xx, „Objektgerichteter Kreis“), wobei ❸a niedrige und ❸b hohe Einzelwerte bezeichnen. In Cluster ❷ finden sich die Variablen des „Subjektgerichteten Kreises“ (Ziffern 2xx). In Cluster ❶ finden sich Variablen der Konfliktachse (Ziffern 4xx).

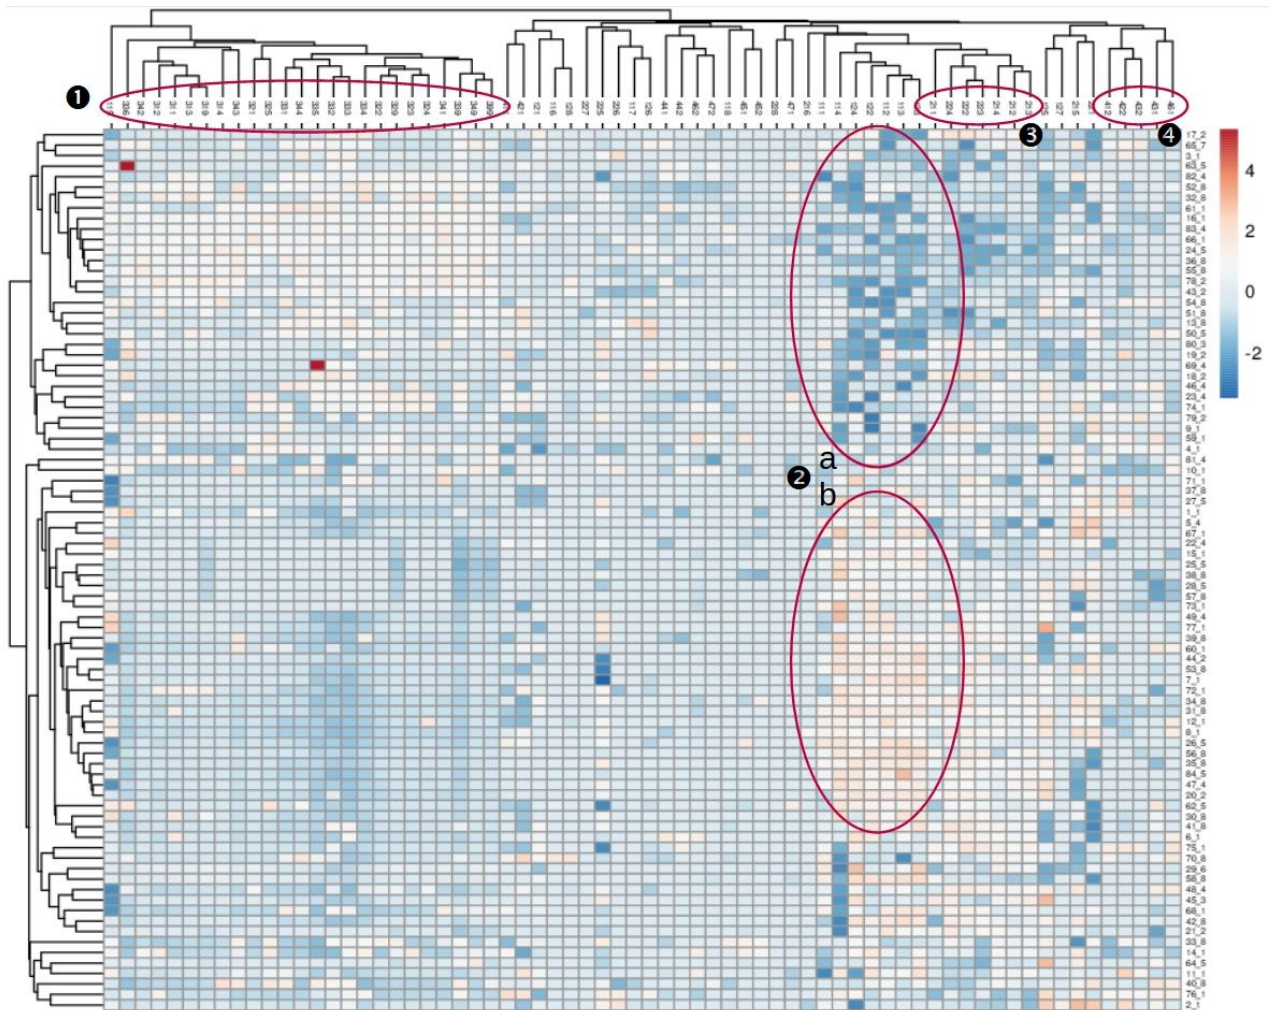

eTab. 1. Kodierungen der einzelnen Variablen aus der OPD-KJ2 .

| Code                                 | Beschreibung                              |
|--------------------------------------|-------------------------------------------|
| <i>Achse Beziehung</i>               |                                           |
| A) Dyaden „Objektgerichteter Kreis“  |                                           |
| 111                                  | 1.1 gewähren lassend                      |
| 112                                  | 1.2 interessiert zugewandt                |
| 113                                  | 1.3 liebevoll behandelnd                  |
| 114                                  | 1.4 freundlich anleitend                  |
| 115                                  | 1.5 bestimmend kontrollierend             |
| 116                                  | 1.6 vorwurfsvoll entwertend               |
| 117                                  | 1.7 aggressiv / feindselig behandelnd     |
| 118                                  | 1.8 desinteressiert abgewandt             |
| 121                                  | 2.1 eigenen Handlungsimpulsen folgend     |
| 122                                  | 2.2 offen und unbefangen                  |
| 123                                  | 2.3 freudig im Kontakt                    |
| 124                                  | 2.4 vertrauensvoll und angepasst          |
| 125                                  | 2.5 fremden Handlungsimpulsen sich fügend |
| 126                                  | 2.6 unzufrieden gefügig                   |
| 127                                  | 2.7 wütend, ängstlich im Kontakt          |
| 128                                  | 2.8 missmutig, sich verschließend         |
| B) Dyaden „Subjektgerichteter Kreis“ |                                           |
| 211                                  | 1.1 gewähren lassend                      |
| 212                                  | 1.2 interessiert zugewandt                |
| 213                                  | 1.3 liebevoll behandelnd                  |
| 214                                  | 1.4 freundlich anleitend                  |
| 215                                  | 1.5 bestimmend kontrollierend             |
| 216                                  | 1.6 vorwurfsvoll entwertend               |
| 217                                  | 1.7 aggressiv / feindselig behandelnd     |
| 218                                  | 1.8 desinteressiert abgewandt             |
| 221                                  | 2.1 eigenen Handlungsimpulsen folgend     |
| 222                                  | 2.2 offen und unbefangen                  |
| 223                                  | 2.3 freudig im Kontakt                    |
| 224                                  | 2.4 vertrauensvoll und angepasst          |
| 225                                  | 2.5 fremden Handlungsimpulsen sich fügend |
| 226                                  | 2.6 unzufrieden gefügig                   |
| 227                                  | 2.7 wütend, ängstlich im Kontakt          |
| 228                                  | 2.8 missmutig, sich verschließend         |
| <i>Achse Struktur</i>                |                                           |
| Bereich Steuerung                    |                                           |
| 311                                  | Impulssteuerung                           |
| 312                                  | Affekttoleranz                            |
| 313                                  | Steuerungsinstanzen                       |
| 314                                  | Selbstwertregulation                      |
| 319                                  | Gesamtwert Steuerung                      |
| Bereich Identität                    |                                           |
| 321                                  | Kohärenz                                  |
| 322                                  | Selbsterleben                             |
| 323                                  | Selbst-Objektdifferenzierung              |

|                           |                                               |
|---------------------------|-----------------------------------------------|
| 324                       | Objekterleben                                 |
| 325                       | Zugehörigkeit                                 |
| 329                       | Gesamtwert Identität                          |
| Bereich Interpersonalität |                                               |
| 331                       | Phantasien                                    |
| 332                       | emotionale Kontaktaufnahme                    |
| 333                       | Reziprozität                                  |
| 334                       | Affekterleben                                 |
| 335                       | Empathie                                      |
| 336                       | Fähigkeit, sich zu trennen                    |
| 339                       | Gesamtwert Interpersonalität                  |
| Bereich Bindung           |                                               |
| 341                       | Zugang zu Bindungsrepräsentationen            |
| 342                       | sichere innere Basis                          |
| 343                       | Fähigkeit, allein zu sein                     |
| 344                       | Nutzen von Bindungsbeziehungen                |
| 349                       | Gesamtwert Bindung                            |
| Alle Bereiche             |                                               |
| 399                       | Gesamtwert Struktur                           |
| <i>Achse Konflikt</i>     |                                               |
| 411                       | Nähe vs. Distanz                              |
| 412                       | Nähe vs. Distanz Verarbeitungsmodus           |
| 421                       | Unterwerfung vs. Kontrolle                    |
| 422                       | Unterwerfung vs. Kontrolle Verarbeitungsmodus |
| 431                       | Selbstversorgen vs. Versorgtwerden            |
|                           | Selbstversorgen vs. Versorgtwerden            |
| 432                       | Verarbeitungsmodus                            |
| 441                       | Selbstwertkonflikt                            |
| 442                       | Selbstwertkonflikt Verarbeitungsmodus         |
| 451                       | Schuldkonflikt                                |
| 452                       | Schuldkonflikt Verarbeitungsmodus             |
| 461                       | Ödipaler Konflikt                             |
| 462                       | Ödipaler Konflikt Verarbeitungsmodus          |
| 471                       | Identitätskonflikt                            |
| 472                       | Identitätskonflikt Verarbeitungsmodus         |
| 48                        | schwere Lebensbelastung aktuell               |
| 49                        | schwere Lebensbelastung zuvor                 |

## eLiteraturverzeichnis

Arbeitskreis OPD-KJ2 (Hrsg.). (2020). OPD-KJ-2 - Operationalisierte Psychodynamische Diagnostik im Kindes- und Jugendalter. Grundlagen und Manual (3., unveränderte Auflage). Bern: Hogrefe AG.

Maurer, M. H. (2006). Software analysis of two-dimensional electrophoretic gels in proteomic experiments. *Current Bioinformatics*, 1 (2), 255-262.

Metsalu, T. & Vilo, J. (2015). Clustvis: a web tool for visualizing clustering of multivariate data using Principal Component Analysis and heatmap. *Nucleic Acids Research*, 43 (W1), W566–W570.
